# Supplementary material for: Secondary-structure switch regulates the substrate binding of a YopJ family acetyltransferase
Source: PubMed Central journal article supplement (PMC8514532; doi:10.1038/s41467-021-26183-1), 2021-10-13
Supplement: 41467_2021_26183_MOESM1_ESM.pdf [file 41467_2021_26183_MOESM1_ESM.pdf]

1

2

## Supplementary Information

3

### **Secondary-structure switch regulates the substrate**

4

### **binding of a YopJ family acetyltransferase**

5 Yao Xia<sup>1,2,8</sup>, Rongfeng Zou<sup>3,8</sup>, Maxime Escouboué<sup>4,8</sup>, Liang Zhong<sup>1,2,8</sup>, Chengjun

6 Zhu<sup>1,2</sup>, Cécile Pouzet<sup>5</sup>, Xueqiang Wu<sup>6</sup>, Yongjin Wang<sup>1,2</sup>, Guohua Lv<sup>7</sup>, Haibo

7 Zhou<sup>6</sup>, Pinghua Sun<sup>1,2\*</sup>, Ke Ding<sup>1,2\*</sup>, Laurent Deslandes<sup>4\*</sup>, Shuguang Yuan<sup>3\*</sup>, Zhi-

8 Min Zhang<sup>1,2\*</sup>

9

10  
11  
12  
13  
14  
15  
16  
17  
18  
19  
20  
21  
22  
23  
24  
25  
26  
27  
28  
29  
30  
31  
32  
33  
34  
35  
36  
37  
38  
39  
40  
41

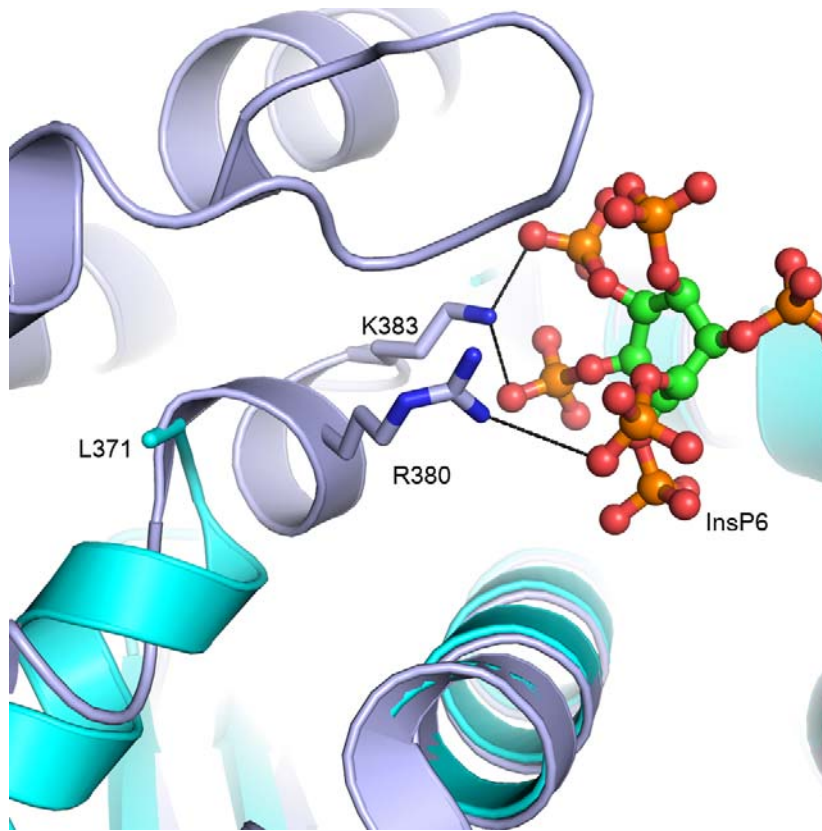

42 **Supplementary Figure 1. Structural comparison of apo-PopP2 and InsP6-**  
43 **bound PopP2 in the InsP6 binding pocket.** The structure of apo-PopP2 is  
44 colored in cyan and the InsP6-bound in light blue. The InsP6 molecule is shown  
45 in stick-and-ball model. The hydrogen-bonding interactions are shown as dashed  
46 lines.

47  
48

49  
50  
51  
52  
53  
54  
55  
56  
57  
58  
59  
60  
61  
62  
63  
64  
65  
66  
67  
68  
69  
70  
71  
72  
73  
74  
75  
76  
77  
78  
79  
80  
81  
82  
83

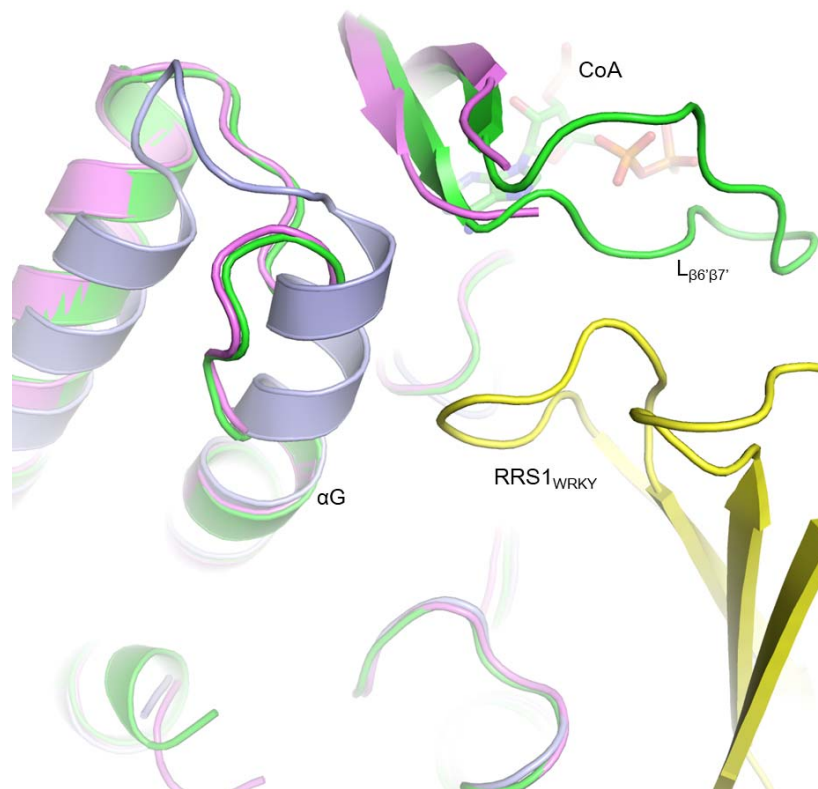

**Supplementary Figure 2. Structural comparison of apo-PopP2 (light blue), InsP6-bound PopP2 (pink) and PopP2-InsP6-CoA-RRS1<sub>WRKY</sub> complex (green) around helix  $\alpha G$ . RRS1<sub>WRKY</sub> is colored in yellow. The CoA molecule is shown in stick-and-ball model.**

84

85 a

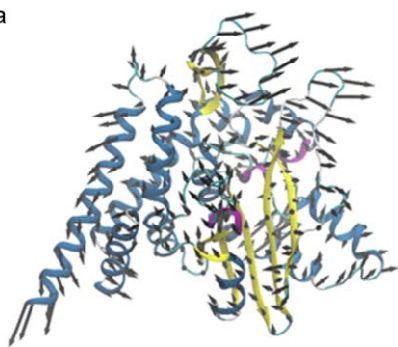

86 b

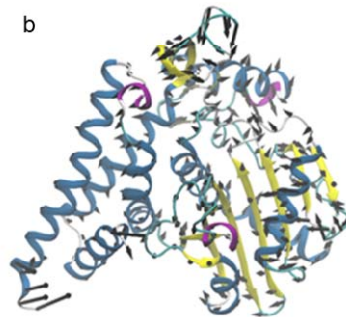

87 e

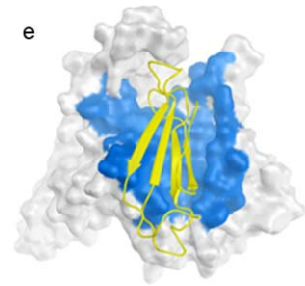

88

89

90

91

92

93

94

95

96

97

98

99

100

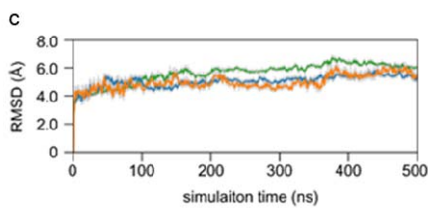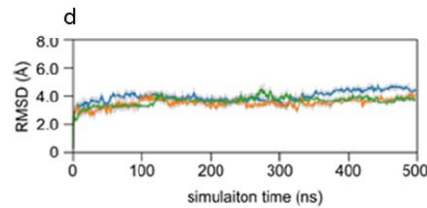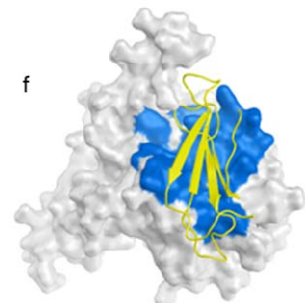

**Supplementary Figure 3. The flexibility study of PopP2 in apo (a, c, e) form and in complex with InsP6 (b, d, f).** (a) and (b): PCA analysis of PopP2. The length of arrow is correlated to the flexibility of corresponding region. (c) and (d): the RMSD of PopP2 during all-atom MD simulations. Each simulation was repeated three times which were represented by green, blue and orange lines. (e) and (f): the binding pocket surface of PopP2.

100

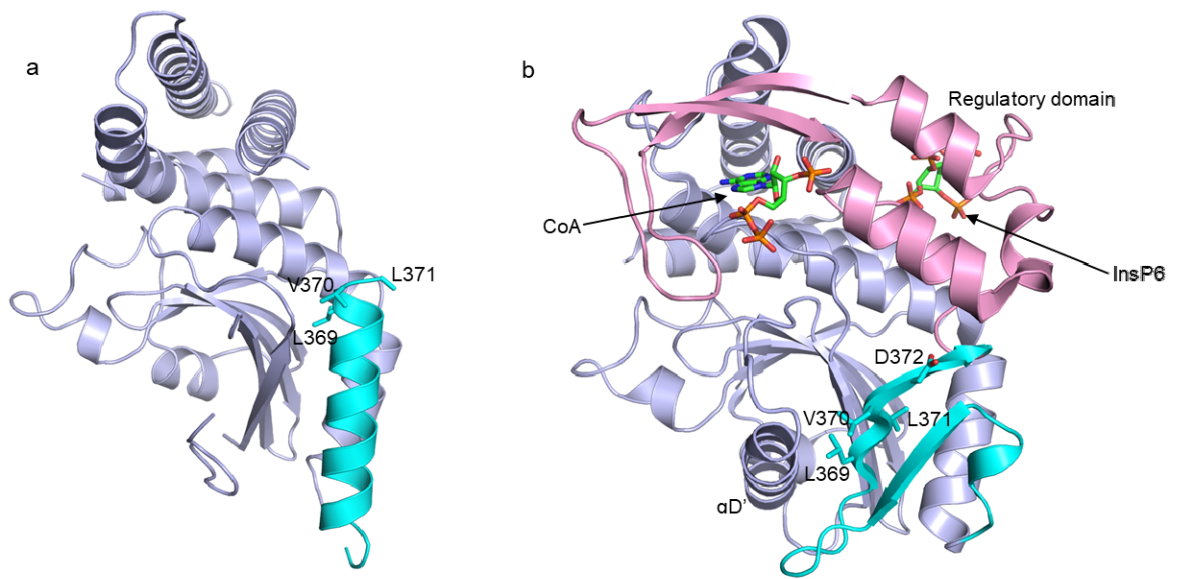

101

102 **Supplementary Figure 4. Residues selected for mutation study in the fold-**

103 **switching motif.** Fold-switching motif in apo (a) and InsP6-bound (b) structures

104 are colored in cyan, with the side chains of the residues selected for mutation

105 study are shown as sticks.

106

107

108

109

110

111

112

113

114

115

116

117

118

119

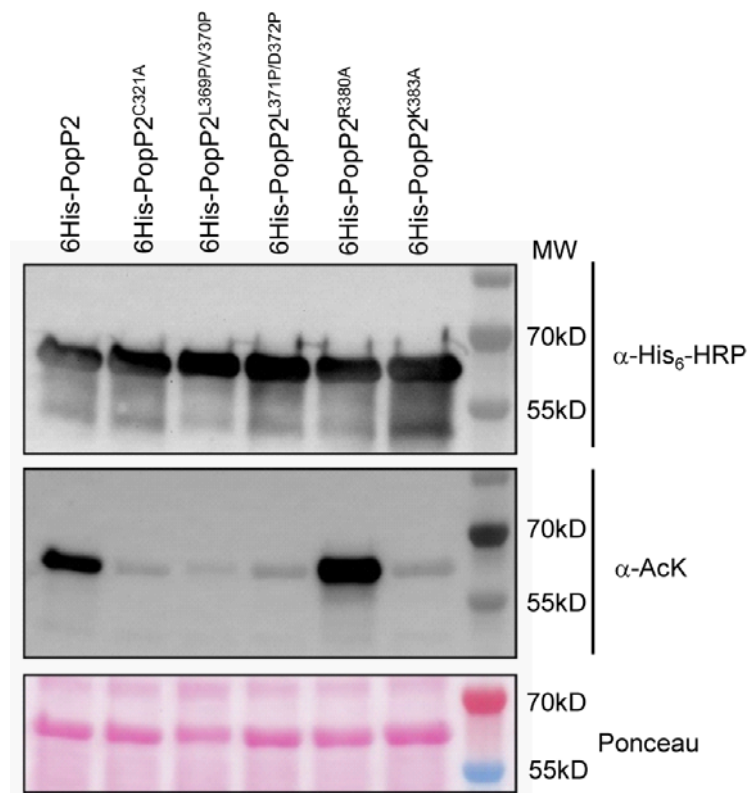

120 **Supplementary Figure 5. PopP2 mutants L369P/V370P, L371P/D372P and**

121 **K383A are affected in their autoacetylation activity.** Recognition of acetylated

122 wild-type PopP2 and R380A mutant, but not PopP2-C321A, PopP2-

123 L369P/V370P, PopP2-L371P/D372P or PopP2-K383A, by an anti-acetyl-lysine

124 antibody. The different PopP2 variants were N-terminally tagged with a

125 6xhistidine and expressed in Rosetta cells. Recombinant proteins were analyzed

126 by immunoblot using an antibody that recognizes 6xhistidine tagged proteins ( $\alpha$ -

127 His<sub>6</sub>-HRP) or acetylated lysines ( $\alpha$ -AcK). 6his-tagged PopP2 proteins are shown

128 after Ponceau staining (top). This experiment was conducted three times with

129 similar results.

130

131

132

133

134

135

136

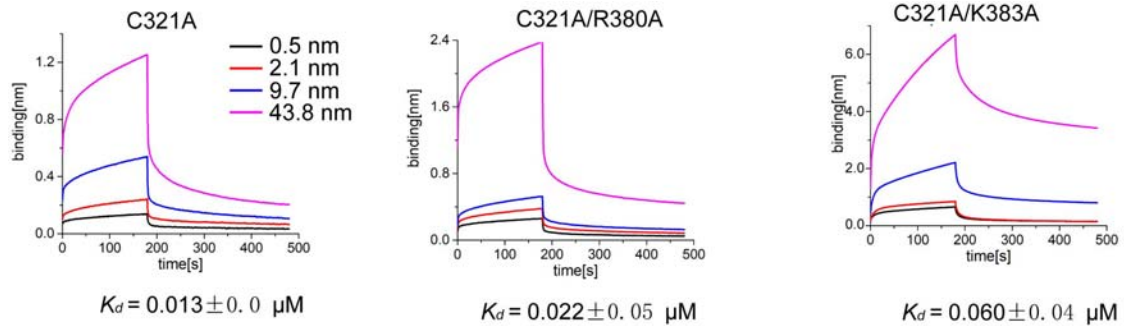

137

138

139

140

141

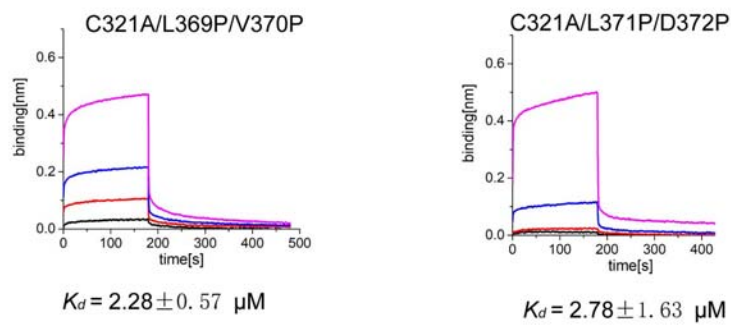

142 **Supplementary Figure 6. Representative binding curves of PopP2 variants**

143 **to RRS1<sub>WRKY</sub> in the presence of InsP6 examined by BLI assays. The**

144 concentrations of PopP2 variants are labeled in the first panel. Representative

145 curves are from one of two independent experiments.

146

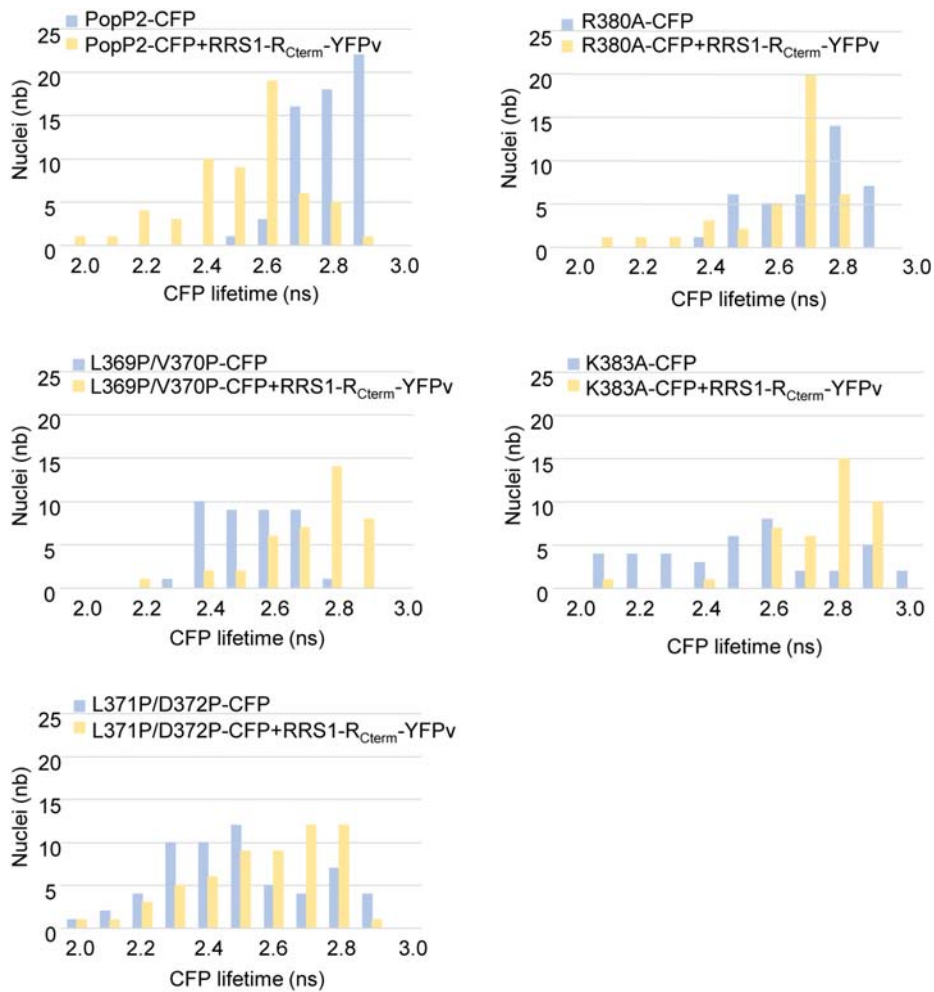

147

148 **Supplementary Figure 7. PopP2 L369P/V370P, L371P/D372P and K383A**  
 149 **mutants are unable to physically interact *in planta* with the C-terminal**  
 150 **portion of RRS1-R containing the WRKY domain (RRS1-R<sub>Cterm</sub>).** CFP lifetime  
 151 distribution of the different PopP2 variants fused with CFP and expressed either  
 152 alone or with RRS1-R<sub>Cterm</sub>-YFPv. Histograms shows the distribution of nuclei  
 153 (number) according to PopP2-CFP lifetime classes in the absence (blue bars) or  
 154 presence (orange bars) of RRS1-R<sub>Cterm</sub>-YFPv. The scanned nuclei correspond to  
 155 those used for FRET-FLIM measurements presented in Table1. This experiment  
 156 was conducted twice with similar results.

157



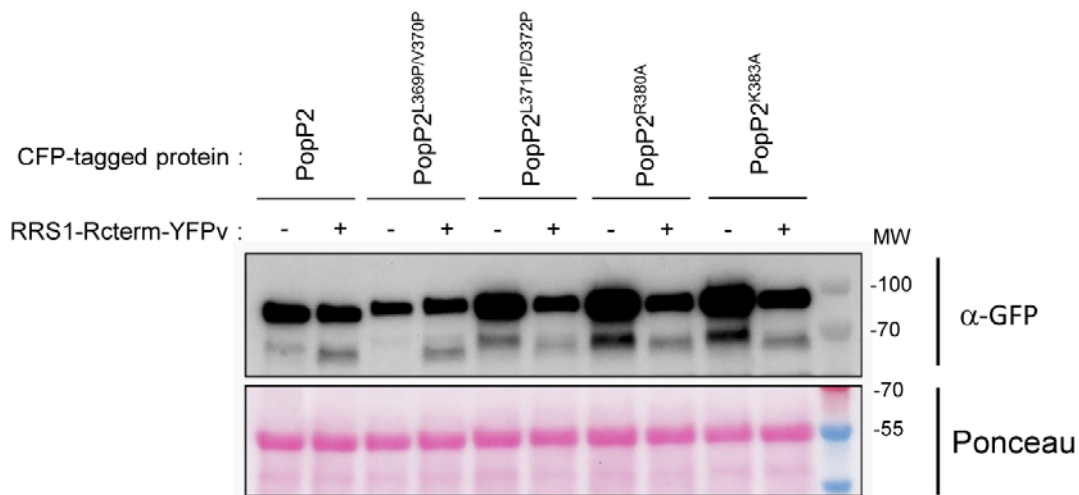

158

159 **Supplementary Figure 8. Immuno-detection of the different PopP2 variants**  
 160 **fused to CFP and expressed either alone or with RRS1-R<sub>Cterm</sub>-YFPv in *N.***  
 161 ***benthamiana*.** The CFP- and YFPv-tagged proteins (crude extracts) are  
 162 detected with an anti-GFP antibody. Ponceau S staining of total protein  
 163 demonstrates equal loading of the samples. The star indicates the signal  
 164 corresponding to RRS1-R<sub>Cterm</sub>-YFPv fusion protein. This experiment was  
 165 conducted twice with similar results.

166

167

168

169

170

171

172

173

174

175

176

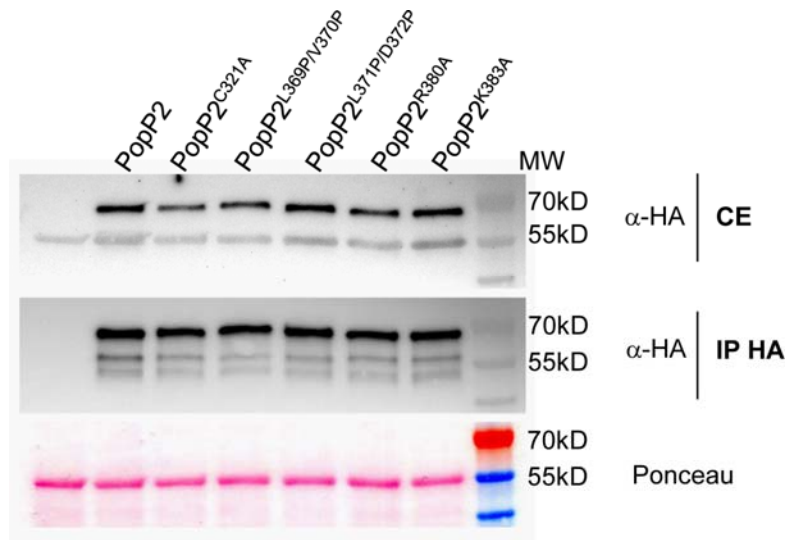

177 **Supplementary Figure 9. Immuno-detection of the different PopP2 variants**

178 **delivered by *Pf0-1* in the *rrs1-1* null mutant.** Leaf samples were harvested 7

179 hours post infiltration (hpi). HA-tagged proteins were detected using an anti-HA-

180 HRP antibody (from crude extracts (CE) and immunoprecipitated proteins).

181 Ponceau staining indicates similar protein amounts loaded in the different lanes.

182 This experiment was conducted three times with similar results.

183

184

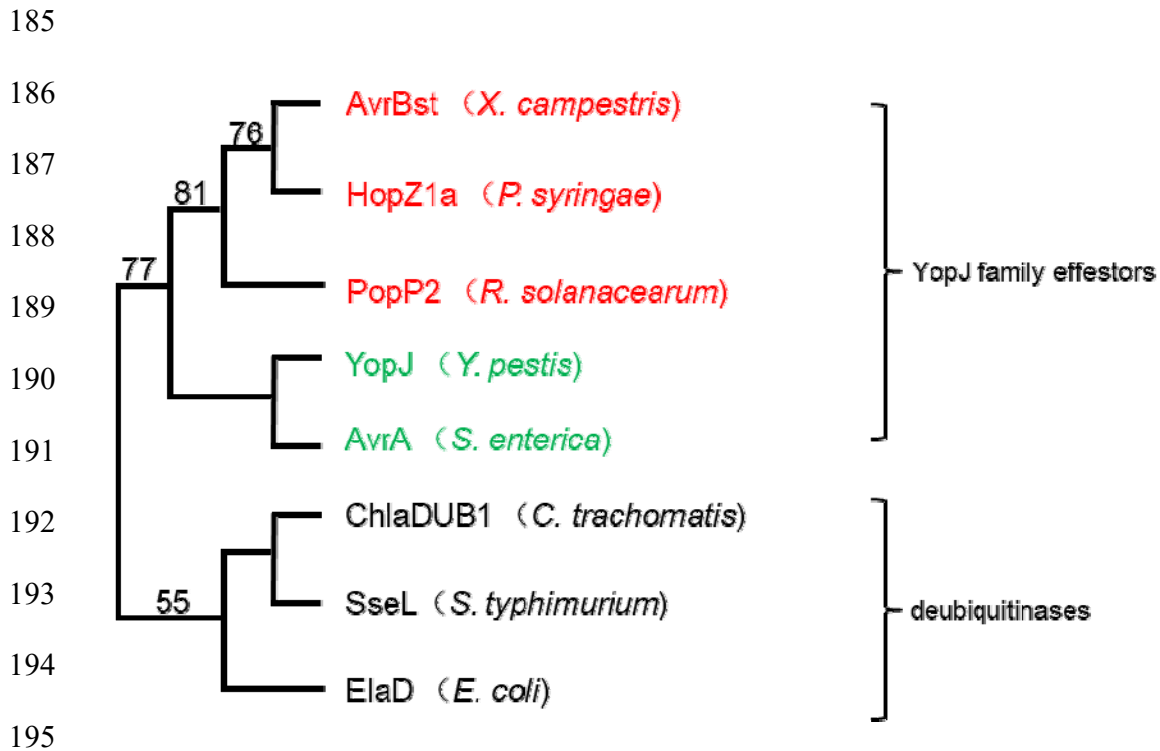

196 **Supplementary Figure 10. Phylogeny of representative CE clan of**

197 **proteases.** The phylogenetic tree was generated with MEGA7 using the

198 sequences of catalytic regions. The GenBank accession numbers of effectors

199 used for this analysis are as follows: AAD39255 for AvrBsT (Residues 61-350),

200 AAR02168 for HopZ1a (Residues 31-369), CAD14570 for PopP2 (Residues 151-

201 488), AKN09807 for YopJ (Residues 1-288), AAL21745 for AvrA (Residues 1-

202 288), B0B9A0.1 for ChlaDUB (Residues 150-401), Q8ZNG2.2 for SseL

203 (Residues159-340) and Q8XCY9.1 for ElaD (Residues 201-407). YopJ effectors

204 produced by plant and animal pathogens are colored in red and green,

205 respectively.

206

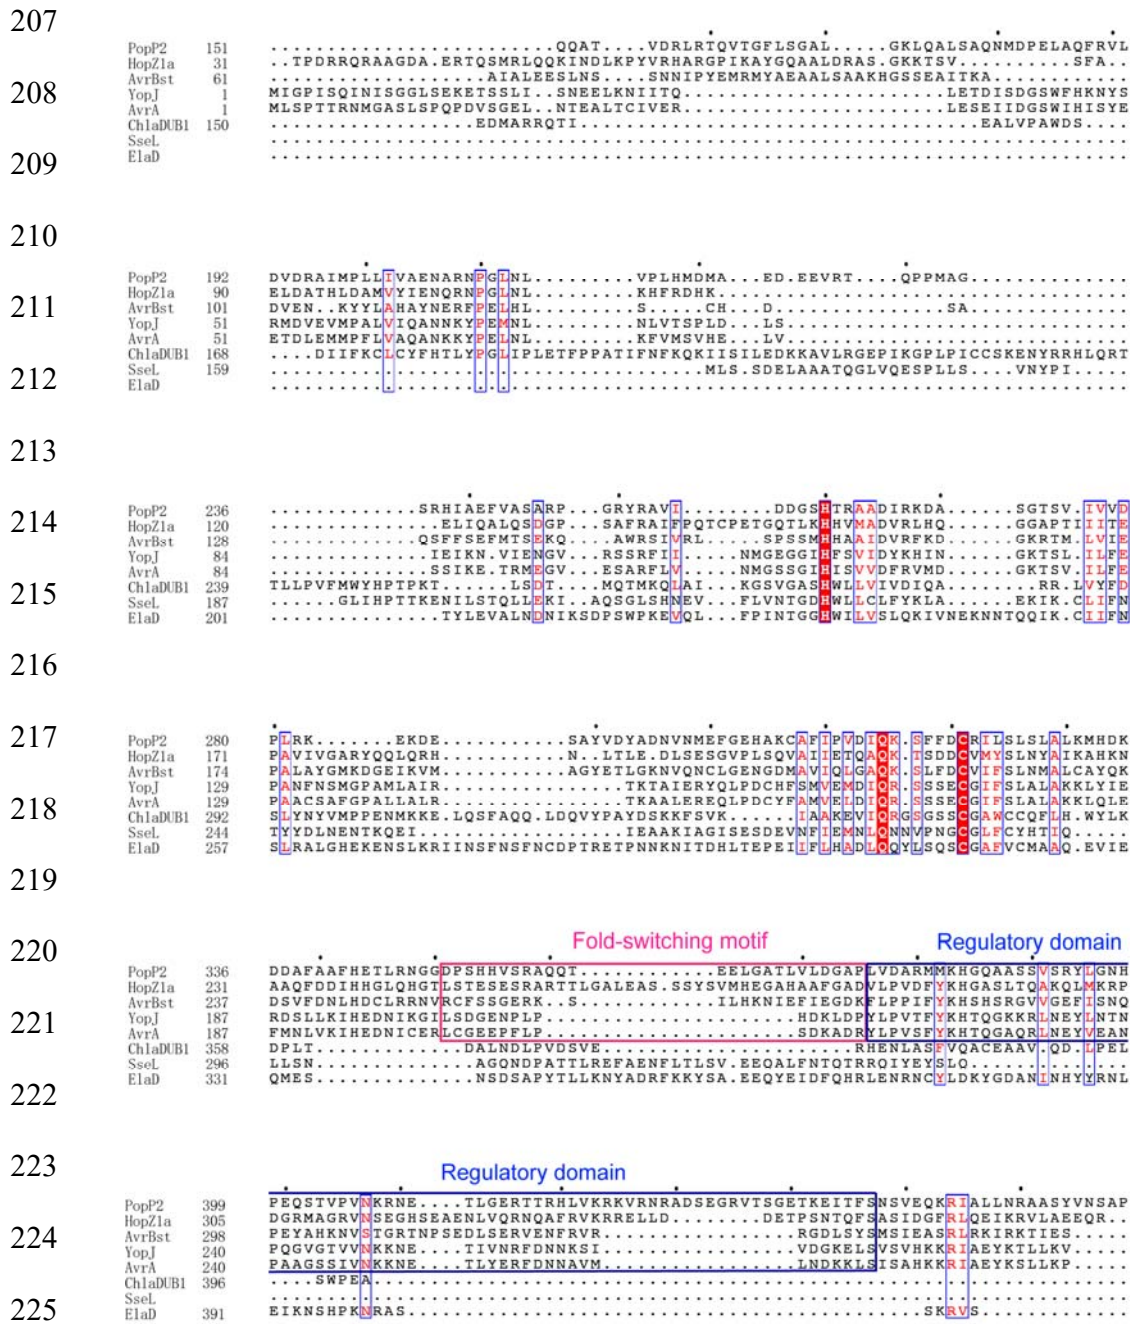

Supplementary Figure 11. Sequence alignment of representative CE clan of proteases. The same sequences were used to perform phylogenetic analysis and sequence alignment. The fold switching motif and regulatory domain are marked by red and blue boxes, respectively.

231 **Supplementary Table 1. Data collection and refinement statistics**

232

| apo-PopP2<br>(7F3N)                                 |                                    |
|-----------------------------------------------------|------------------------------------|
| <b>Data collection</b>                              |                                    |
| Space group                                         | P 3 <sub>2</sub> 2 1               |
| Cell dimensions                                     |                                    |
| <i>a</i> , <i>b</i> , <i>c</i> (Å)                  | 89.4, 89.4, 79.9                   |
| $\alpha$ , $\beta$ , $\gamma$ (°)                   | 90.00, 90.00, 120.00               |
| Resolution (Å)                                      | 50.00-2.35(2.43-2.35) <sup>a</sup> |
| <i>R</i> <sub>merge</sub>                           | 0.136(0.702)                       |
| <i>I</i> / $\sigma$ ( <i>I</i> )                    | 15.9(2.6)                          |
| <i>CC</i> <sub>1/2</sub>                            | 0.984(0.898)                       |
| Completeness (%)                                    | 100.0(100.0)                       |
| Redundancy                                          | 9.9(10.2)                          |
| <b>Refinement</b>                                   |                                    |
| Resolution (Å)                                      | 50.00-2.35                         |
| No. reflections                                     | 15654                              |
| <i>R</i> <sub>work</sub> / <i>R</i> <sub>free</sub> | 0.193/0.231                        |
| No. atoms                                           |                                    |
| Protein                                             | 1853                               |
| Water                                               | 34                                 |
| <i>B</i> factors                                    |                                    |
| Protein                                             | 68.0                               |
| Water                                               | 55.4                               |
| R.m.s. deviations                                   |                                    |
| Bond lengths (Å)                                    | 0.004                              |
| Bond angles (°)                                     | 0.78                               |

233 <sup>a</sup>Values in parentheses are for highest-resolution shell.

234

235

236 **Supplementary Table 2. Energies of RRS1<sub>WRKY</sub> binding to apo- and InsP6-**  
237 **bound PopP2. All terms are in kcal/mol.**

|                   | $\Delta G$ (kcal/mol) | $\Delta H$ (kcal/mol) | $-T \Delta S$ (kcal/mol) |
|-------------------|-----------------------|-----------------------|--------------------------|
| apo-PopP2         | $-3.8 \pm 3.8$        | $-59.7 \pm 5.9$       | $55.9 \pm 8.7$           |
| InsP6-bound PopP2 | $-9.1 \pm 4.3$        | $-85.3 \pm 8.1$       | $76.2 \pm 10.5$          |

238  
239  
240  
241

242 **Supplementary Table 3. Primers used in this study.**

243

| Primer name       | sequence                                           |
|-------------------|----------------------------------------------------|
| AttB1-PopP2       | GGGGACAAGTTTGTACAAAAAAGCAGGCTTAATGAAGGTCAGTAGCGCA  |
| AttB2-PopP2       | GGGGACCACTTTGTACAAGAAAGCTGGGTCGTTGGTATCCAATAGGGAAT |
| PopP2-Fw          | ATGAAGGTCAGTAGCGCAAACGC                            |
| PopP2-Rev         | GTCGTTGGTATCCAATAGGGA                              |
| PopP2-C321A-Fw    | TCCTTCTTCGATGCCCGGATACTCTCCCTGTCACT                |
| PopP2-C321A-Rev   | GAGAGTATCCGGGCATCGAAGAAGGACTTCTGAAT                |
| P2-L369-V370P-Fw  | AGGAACTTGGCGCTACCCACCGCTTGATGGTGCGCCACTGGT         |
| P2-L369-V370P-Rev | TGGCGCACCATCAAGCGGTGGGGTAGCGCCAAGTTCCTCCGT         |
| P2-L371-D372P-Fw  | GGCGCTACCCTTGTGCCTCCAGGTGCGCCACTGGTCGA             |
| P2-L371-D372P-Rev | ACCAGTGGCGCACCTGGAGGCACAAGGGTAGCGCCAAGT            |
| P2-R380A-Fw       | TGGTCGACGCCGCTATGATGAAACATGGTCAAGCCGCA             |
| P2-R380A-Rev      | ACCATGTTTCATCATAGCGGCGTCGACCAGTGGCGCAC             |
| P2-K383A-Fwd      | GTATGATGGCACATGGTCAAGCCGCA                         |
| P2-K383A-Rev      | CTTGACCATGTGCCATCATAACGGGCGT                       |
