# Supplementary material for: Secondary-structure switch regulates the substrate binding of a YopJ family acetyltransferase
Source: PubMed Central journal article supplement (PMC8514532; doi:10.1038/s41467-021-26183-1), 2021-10-13
Supplement: 41467_2021_26183_MOESM3_ESM.pdf [file 41467_2021_26183_MOESM3_ESM.pdf]

## **Description of Additional Supplementary Files**

**Supplementary Movie 1.** Transition of the fold-switching motif from  $\alpha$ -helix into  $\beta$ -strand

**Supplementary Movie 2.** Structural changes of PopP2 without the presence of InsP6

**Supplementary Movie 3.** Structural changes of PopP2 in the presence of InsP6

**Supplementary Movie 4.** An example trajectory in the metadynamics simulations
